# Supplementary material for: Food Patterns among Chinese Immigrants Living in the South of Spain
Source: MDPI journal article supplement (doi:10.3390/nu13030766), 2021-02-26
Supplement: s1 [file s1]

# Annex I. Consolidated criteria for reporting qualitative studies (COREQ): 32-item checklist

| No                                             | Item                                     | Guide questions/description                                                                                                               | Response                                                                                                        |
|------------------------------------------------|------------------------------------------|-------------------------------------------------------------------------------------------------------------------------------------------|-----------------------------------------------------------------------------------------------------------------|
| <b>Domain 1: Research team and reflexivity</b> |                                          |                                                                                                                                           |                                                                                                                 |
| Personal Characteristics                       |                                          |                                                                                                                                           |                                                                                                                 |
| 1.                                             | Interviewer/facilitator                  | Which author/s conducted the interview or focus group?                                                                                    | All the interviews were conducted by the main author, Author 1.                                                 |
| 2.                                             | Credentials                              | What were the researcher's credentials? E.g. PhD, MD                                                                                      | Author 1, Author 4 and Author 2 were PhD. Author 3 was a nursing student.                                       |
| 3.                                             | Occupation                               | What was their occupation at the time of the study?                                                                                       | Researcher's occupations at the time of the study: student and research professor.                              |
| 4.                                             | Gender                                   | Was the researcher male or female?                                                                                                        | Author 1 and Author 3 were females. Author 4 and Author 2 were males.                                           |
| 5.                                             | Experience and training                  | What experience or training did the researcher have?                                                                                      | All researchers had experience in carrying out qualitative research. BB has been trained to conduct interviews. |
| Relationship with participants                 |                                          |                                                                                                                                           |                                                                                                                 |
| 6.                                             | Relationship established                 | Was a relationship established prior to study commencement?                                                                               | No, there wasn't.                                                                                               |
| 7.                                             | Participant knowledge of the interviewer | What did the participants know about the researcher? e.g. personal goals, reasons for doing the research                                  | Name, occupation, reasons for doing the research.                                                               |
| 8.                                             | Interviewer characteristics              | What characteristics were reported about the interviewer/facilitator? e.g. Bias, assumptions, reasons and interests in the research topic | Name, occupation, contact method, reasons for doing the research.                                               |
| <b>Domain 2: Study design</b>                  |                                          |                                                                                                                                           |                                                                                                                 |
| Theoretical framework                          |                                          |                                                                                                                                           |                                                                                                                 |

|                       |                                       |                                                                                                                                                          |                                                                                       |
|-----------------------|---------------------------------------|----------------------------------------------------------------------------------------------------------------------------------------------------------|---------------------------------------------------------------------------------------|
| 9.                    | Methodological orientation and Theory | What methodological orientation was stated to underpin the study? e.g. grounded theory, discourse analysis, ethnography, phenomenology, content analysis | Ethnographic approach with a discourse and content analysis.                          |
| Participant selection |                                       |                                                                                                                                                          |                                                                                       |
| 10.                   | Sampling                              | How were participants selected? e.g. purposive, convenience, consecutive, snowball                                                                       | Convenience sampling and snowball sampling.                                           |
| 11.                   | Method of approach                    | How were participants approached? e.g. face-to-face, telephone, mail, email                                                                              | Face to face.                                                                         |
| 12.                   | Sample size                           | How many participants were in the study?                                                                                                                 | 133 Chinese immigrants                                                                |
| 13.                   | Non-participation                     | How many people refused to participate or dropped out? Reasons?                                                                                          | 279 for laboral reasons (mainly lack of time).                                        |
| Setting               |                                       |                                                                                                                                                          |                                                                                       |
| 14.                   | Setting of data collection            | Where was the data collected? e.g. home, clinic, workplace                                                                                               | Mainly in workplace, and other quiet and comfortable place chosen by the participant. |
| 15.                   | Presence of non-participants          | Was anyone else present besides the participants and researchers?                                                                                        | In all businesses there were other workers or family members (children among them).   |
| 16.                   | Description of sample                 | What are the important characteristics of the sample? e.g. demographic data, date                                                                        | Chinese workers in their 30's emigrated to Spain.                                     |
| Data collection       |                                       |                                                                                                                                                          |                                                                                       |
| 17.                   | Interview guide                       | Were questions, prompts, guides provided by the authors? Was it pilot tested?                                                                            | Yes, they were. / Yes, it was.                                                        |
| 18.                   | Repeat interviews                     | Were repeat inter views carried out? If yes, how many?                                                                                                   | No, they weren't.                                                                     |
| 19.                   | Audio/visual recording                | Did the research use audio or visual recording to collect the data?                                                                                      | Audio recording.                                                                      |
| 20.                   | Field notes                           | Were field notes made during and/or after the interview or focus group?                                                                                  | Yes, they were (field notes).                                                         |
| 21.                   | Duration                              | What was the duration of the inter views or focus group?                                                                                                 | Average 15-30 minutes.                                                                |
| 22.                   | Data saturation                       | Was data saturation discussed?                                                                                                                           | Yes, it was.                                                                          |

|     |                      |                                                                          |                               |
|-----|----------------------|--------------------------------------------------------------------------|-------------------------------|
| 23. | Transcripts returned | Were transcripts returned to participants for comment and/or correction? | Reviewed by 2 key informants. |
|-----|----------------------|--------------------------------------------------------------------------|-------------------------------|

### Doman 3: Analysis and findings

#### Data analysis

|     |                                |                                                             |                                         |
|-----|--------------------------------|-------------------------------------------------------------|-----------------------------------------|
| 24. | Number of data coders          | How many data coders coded the data?                        | Two (Author 1 and Author 4).            |
| 25. | Description of the coding tree | Did authors provide a description of the coding tree?       | Yes, we did.                            |
| 26. | Derivation of themes           | Were themes identified in advance or derived from the data? | Themes were derived using both methods. |
| 27. | Software                       | What software, if applicable, was used to manage the data?  | NUDIST Nvivo 12.                        |
| 28. | Participant checking           | Did participants provide feedback on the findings?          | Reviewed by 2 key informants.           |

#### Reporting

|     |                              |                                                                                                                                 |                                    |
|-----|------------------------------|---------------------------------------------------------------------------------------------------------------------------------|------------------------------------|
| 29. | Quotations presented         | Were participant quotations presented to illustrate the themes/findings? Was each quotation identified? e.g. participant number | Yes, there were. / Yes, there was. |
| 30. | Data and findings consistent | Was there consistency between the data presented and the findings?                                                              | Yes, there was.                    |
| 31. | Clarity of major themes      | Were major themes clearly presented in the findings?                                                                            | Yes, they were.                    |
| 32. | Clarity of minor themes      | Is there a description of diverse cases or discussion of minor themes?                                                          | Yes, there is.                     |

Developed from: Tong, A. Sainsbury, P., and Craig, J. 2007. Consolidated criteria for reporting qualitative research (COREQ): A 32- item checklist for interviews and focus group. *Int. J. Qual. Health Care* 19: 349-357.
